# Supplementary material for: A predatory myxobacterium controls cucumber Fusarium wilt by regulating the soil microbial community
Source: PubMed Central journal article supplement (PMC7137222; doi:10.1186/s40168-020-00824-x), 2020-04-06
Supplement: 40168_2020_824_MOESM8_ESM.pdf [file 40168_2020_824_MOESM8_ESM.pdf]

**Day 27**

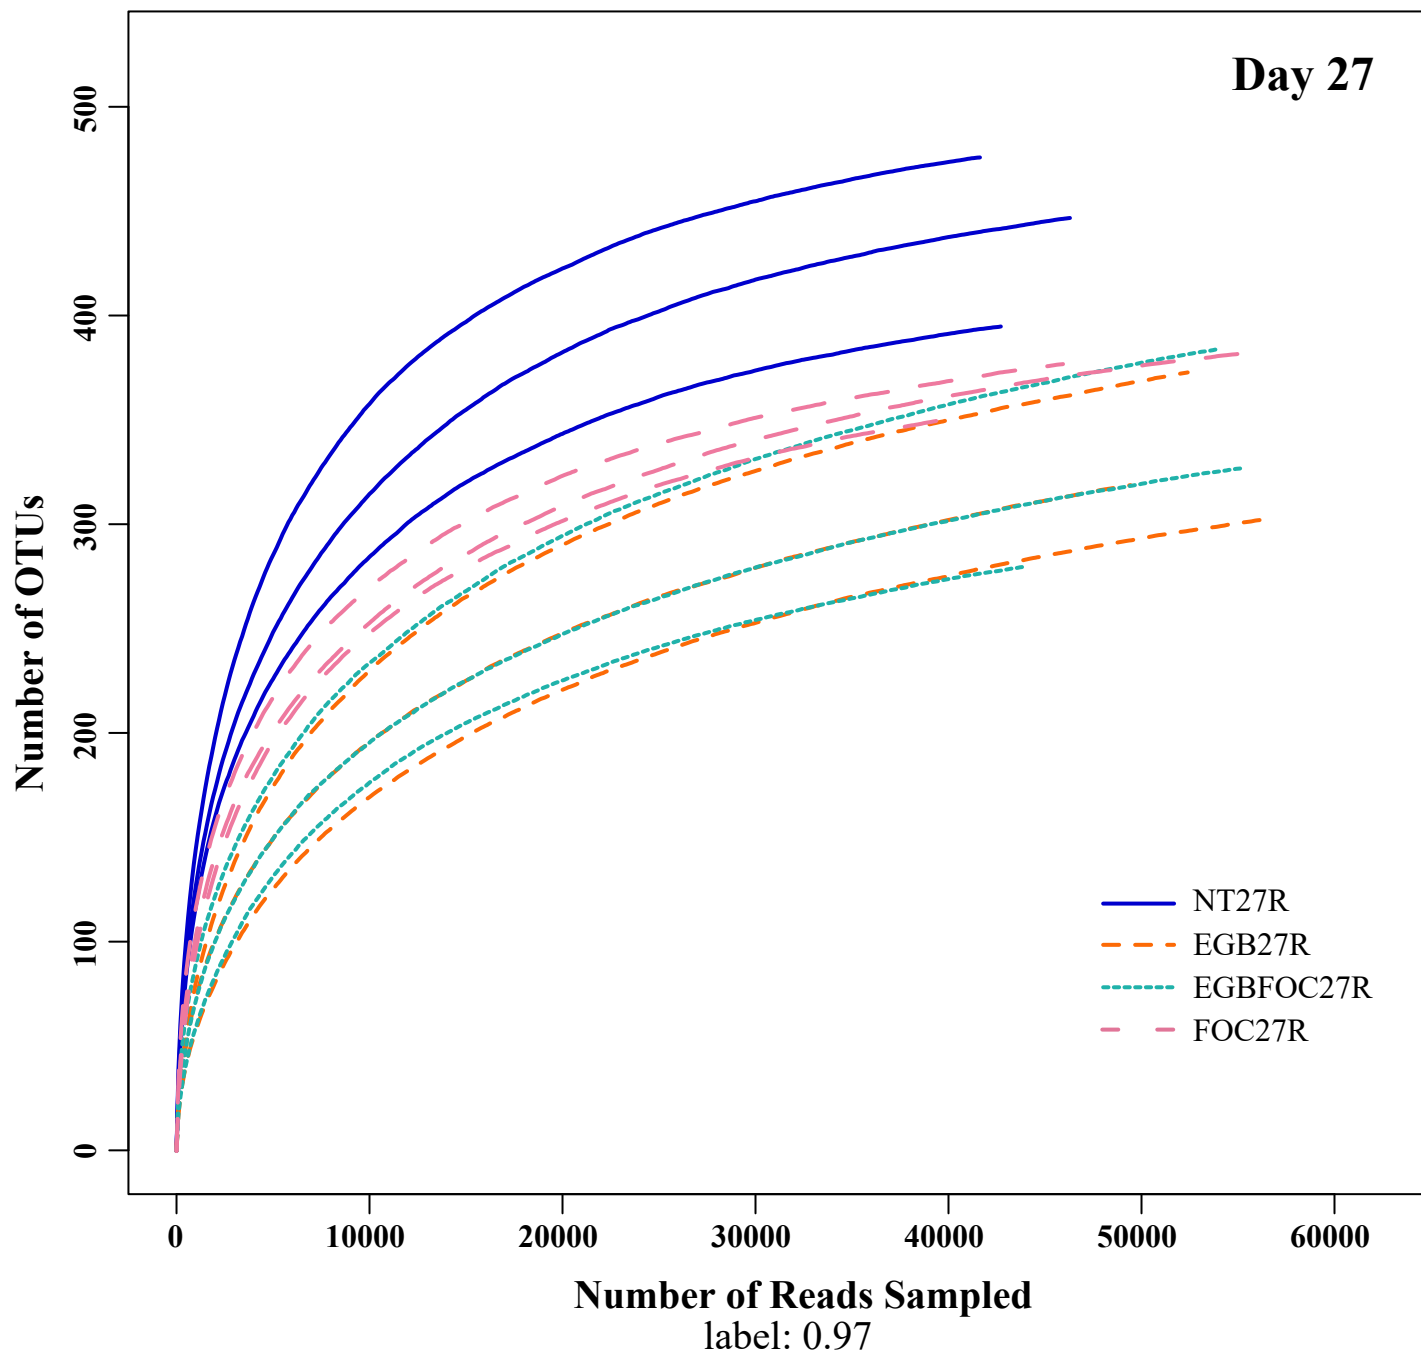

label: 0.97
